# Supplementary material for: HPV16 E6 Oncogene Contributes to Cancer Immune Evasion by Regulating PD-L1 Expression through a miR-143/HIF-1a Pathway
Source: MDPI journal article supplement (doi:10.3390/v16010113), 2024-01-12
Supplement: s1 [file s1]

## Supplementary Figures

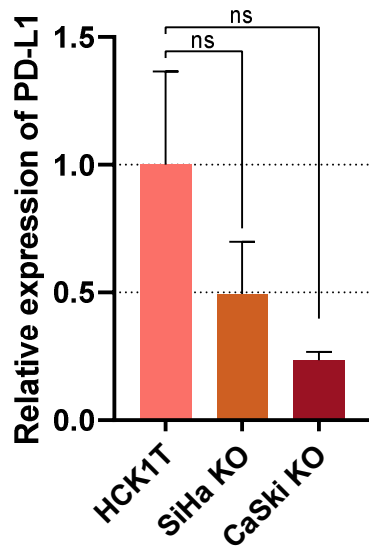

**Figure S1.** Bar graphs representing qPCR results. KO cervical cancer cell lines SiHa and CaSki were compared to normal cervical keratinocytes HCK1T. PD-L1 expression was normalized with GUSB. ns = non-significant.

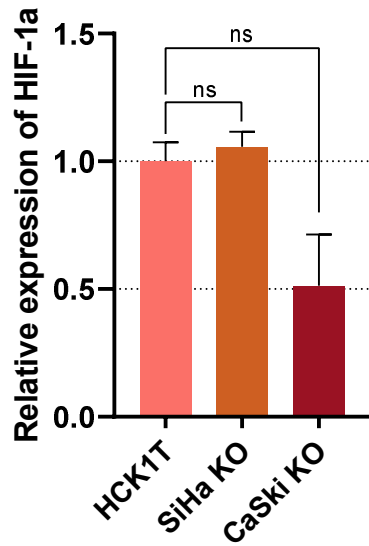

**Figure S2.** Bar graphs representing qPCR results. KO cervical cancer cell lines SiHa and CaSki were compared to normal cervical keratinocytes HCK1T. HIF-1a expression was normalized with GUSB. ns = non-significant.

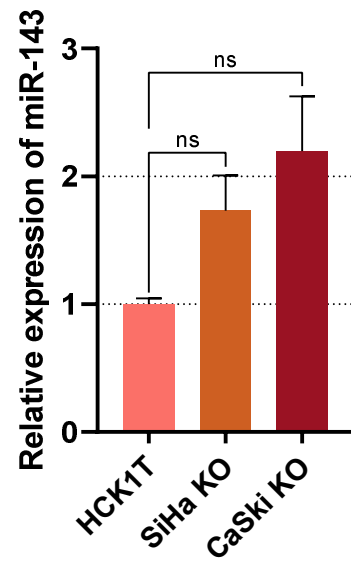

**Figure S3.** Bar graphs representing qPCR results. KO cervical cancer cell lines SiHa and CaSki were compared to normal cervical keratinocytes HCK1T. miR-143 expression was normalized with U6. ns = non-significant.
